# Supplementary material for: Diagnosis and Management of Malnutrition in Patients with Heart Failure
Source: MDPI journal article supplement (doi:10.3390/jcm12093320), 2023-05-06
Supplement: s1 [file s1]

**Supplementary material. Table S1. General dietary recommendations to improve cardiovascular health.**

|                                                                                                                                                                                                                                                                                                                                            |
|--------------------------------------------------------------------------------------------------------------------------------------------------------------------------------------------------------------------------------------------------------------------------------------------------------------------------------------------|
| 1. Adjust energy intake and expenditure to achieve and maintain an adequate body weight.                                                                                                                                                                                                                                                   |
| 2. Eat abundant and varied fruit and vegetables.                                                                                                                                                                                                                                                                                           |
| 3. Prioritize whole foods and products.                                                                                                                                                                                                                                                                                                    |
| 4. Choose healthy sources of protein <ul style="list-style-type: none"> <li>a. mainly vegetable proteins (legumes and nuts)</li> <li>b. fish and shellfish</li> <li>c. low-fat or fat-free dairy products instead of full-fat dairy products</li> <li>d. if you eat meat or poultry, choose lean cuts and avoid processed food.</li> </ul> |
| 5. Use liquid vegetable oils instead of tropical oils (coconut, palm) and partially hydrogenated (trans) fats.                                                                                                                                                                                                                             |
| 6. Choose minimally-processed foods instead of ultra-processed foods *.                                                                                                                                                                                                                                                                    |
| 7. Minimize the intake of drinks and foods with added sugars.                                                                                                                                                                                                                                                                              |
| 8. Choose and prepare foods with a reduced salt intake.                                                                                                                                                                                                                                                                                    |
| 9. If you do not drink alcohol, do not start; if you choose to drink alcohol, limit your intake as much as possible.                                                                                                                                                                                                                       |
| 10. Stick to these recommendations, regardless of where the food is prepared or eaten.                                                                                                                                                                                                                                                     |

Adapted from Heidenreich PA and Vest AR [2,38].

\*There is no commonly accepted definition for ultra-processed foods, and there may be healthy foods in the category of ultra-processed foods.

**Supplementary material. Table S2. Differential characteristics between the DASH diet and the Mediterranean diet.**

| Parameters                        | Mediterranean diet                                                                                                                                                                                                                                                 | DASH diet                                                                                                                                                  |
|-----------------------------------|--------------------------------------------------------------------------------------------------------------------------------------------------------------------------------------------------------------------------------------------------------------------|------------------------------------------------------------------------------------------------------------------------------------------------------------|
| <b>Commonalities</b>              | <p><u>Basic consumption</u>: whole grains, legumes, fruit, vegetables and nuts.</p> <p><u>Limited consumption</u>: red meat, sweets, sugary drinks.</p>                                                                                                            | <p><u>Basic consumption</u>: whole grains, legumes, fruit and vegetables, seeds and nuts. <u>Limited consumption</u>: red meat, sweets, sugary drinks.</p> |
| <b>Animal protein consumption</b> | <p>It emphasizes the consumption of fish (especially oily) and lean meat.</p> <p>It limits red and processed meat.</p>                                                                                                                                             | <p>The consumption of poultry, lean meats and fish is recommended (without specifying white or oily).</p>                                                  |
| <b>Alcohol consumption</b>        | <p>It recommends a moderate consumption of alcohol (wine)</p> <p>There are new scores that do not consider moderate consumption as "healthy" and do not count it for the score.</p>                                                                                | <p>It recommends reducing the consumption of alcohol.</p>                                                                                                  |
| <b>High-fat foods</b>             | <p>It does not restrict fat intake, but recommends a healthy lipid profile (more MUFA and PUFA: in the form of olive oil, oily fish, nuts, etc.)</p> <p>Olive oil: phenolic compounds (hydroxytyrosol) help to prevent oxidative and anti-inflammatory damage.</p> | <p>It recommends a reduction in total fats, with the emphasis on saturated fats. It recommends: skimmed dairy products, reduction in red meat, etc.</p>    |
| <b>Salt intake</b>                | <p>None of the Mediterranean diet adherence scores address salt content, limiting only the consumption of red meat</p>                                                                                                                                             | <p>It reduces the addition of salt (spices and other techniques are recommended for seasoning dishes) and limits high-salt</p>                             |

|              |                                                                                                                                                                                                                                                                                                                                                                                                                                                                                                 |                                                                               |
|--------------|-------------------------------------------------------------------------------------------------------------------------------------------------------------------------------------------------------------------------------------------------------------------------------------------------------------------------------------------------------------------------------------------------------------------------------------------------------------------------------------------------|-------------------------------------------------------------------------------|
|              | and other high-salt products. Thus, consumption is reduced.                                                                                                                                                                                                                                                                                                                                                                                                                                     | products. There are two restrictions: <2.3 g/d or <1.5 g/d (more restrictive) |
| <b>Score</b> | <p>There are several methods of scoring diet adherence (PREDIMED and others), and there are discrepancies between the systems:</p> <ul style="list-style-type: none"> <li>- Some systems rate the consumption of olive oil or foods high in MUFA (rather than the saturated fat ratio).</li> <li>- Some do not include a score for alcohol consumption.</li> <li>- Some include a score for a low consumption of sweets or for maintaining a moderate consumption of dairy products.</li> </ul> | All the studies are performed with the same score.                            |
